# Supplementary material for: Identification and validation of a blood- based diagnostic lipidomic signature of pediatric inflammatory bowel disease
Source: PubMed Central journal article supplement (PMC11148148; doi:10.1038/s41467-024-48763-7), 2024-06-03
Supplement: 41467_2024_48763_MOESM2_ESM.pdf [file 41467_2024_48763_MOESM2_ESM.pdf]

### Identification and validation of a blood-based diagnostic lipidomic signature of pediatric inflammatory bowel disease

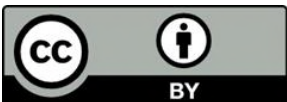

**Open Access** This file is licensed under a Creative Commons Attribution 4.0 International License, which permits use, sharing, adaptation, distribution and reproduction in any medium or format, as long as you give appropriate credit to the original author(s) and the source, provide a link to the Creative Commons license, and indicate if changes were made. In the cases where the authors are anonymous, such as is the case for the reports of anonymous peer reviewers, author attribution should be to 'Anonymous Referee' followed by a clear attribution to the source work. The images or other third party material in this file are included in the article's Creative Commons license, unless indicated otherwise in a credit line to the material. If material is not included in the article's Creative Commons license and your intended use is not permitted by statutory regulation or exceeds the permitted use, you will need to obtain permission directly from the copyright holder. To view a copy of this license, visit <http://creativecommons.org/licenses/by/4.0/>.

## **REVIEWER COMMENTS**

### **Reviewer #1 (Remarks to the Author):**

The authors present a study on identification, validation and comparison of a novel lipidomic signature for diagnosis of PIBD. The comparison to CRP and FcP, alongside validation in a distinct cohort is important. The study is of interest, has a clear clinical translation (although the emphasis on diagnosis vs screening might need to be considered) and is well written. I have comments and questions which may be addressed by the authors to clarify points.

Introduction-The authors present a good overview of the topic. I think the emphasis on diagnosis may be slightly confusing- is this a tool aiming to help with screening? Such as CRP or FcP? Diagnostic processes are through endoscopy, and thus this tool will not be replacing that method of diagnosis. CRP, for example, may be a useful as a (relatively) sensitive tool, but it is highly non-specific. FcP is a fantastic screening and monitoring tool, and stool tests are much more widely accepted, especially with postal kits and home testing kits available.

Methods- These are nicely described. I have some specific questions-

- Were cases and controls recruited at the same time points, most importantly blood samples achieved at the same point in the diagnostic pathway (rather than only cases recruited at a point after bowel prep, after fasting etc.)
- How long after the initial recruitment were non-IBD controls followed-up for?
- I am pleased the statistical methods are corrected for multiple testing
- Am i correct in thinking that largely all patients were pooled for analyses, regardless of age, phenotypic subtype, disease severity etc.?

Results-

- When models were employed what was the stability of the lipid profiles ascertained in the model? I.e. when cross-validation/random sampling was done were the same lipids always identified, or were different patterns identified each time?
- I think a NPV of 76%, whilst interesting, is likely difficult to apply in the clinic as a unique tool, however it could be used in the context of other tests. Further results indicate comparable performance to FcP in the AUC.
- For the controls, what conditions were diagnosed (if any), were all patients and controls screened for infection? Would these lipid signatures be replicated in other non-IBD inflammatory states (such as infection) in a similar way to FcP, or are they distinct?
- Was CRP only used in the analyses in the confirmed absence of GI or systemic infection?
- It is notable that both the discovery and validation cohorts' control children are younger than the IBD patients? How does metabolic maturation of lipids progress with age/puberty and could these models merely be detecting differences in metabolism related to age, rather than IBD vs controls?
- It would be useful to see a full comparison of the clinical, demographic features of IBD vs controls in table 1- including BMI etc. This has the potential to be a serious confounder.

Discussion-

The discussion is well written, focusing on the literature and the important strengths and limitations of the work. I think the authors would acknowledge the limitations set out above in any revision of the article.

- Whilst this is not the purpose of the study, what is the metabolic driver of these lipids, what could the pathogenesis be resulting in elevation/decrease? With FcP there is a clear process related to inflammation in the gut, confirming that it's a biologically relevant marker for disease. This is less clear here although is alluded to in the initial paragraph.
- Is there any work on these lipids (PC and LacCer) in systemic inflammation, or other inflammatory processes? Are these merely a marker of inflammation or are these specific to IBD?

## **Reviewer #2 (Remarks to the Author):**

The authors have performed a compressive study of lipid omics in pediatric IBD. The patient sample characteristics shows inclusion of diverse patients. The data was analyzed by diverse mathematical and statistical perspective. Training and validation were performed according to acceptable standard. The data clearly shows the association of two newly discovered lipid species that compete well to clinically used hsCRP. The authors have reported a NPV of 76% compared to 40% for hsCRP which is significantly better. These results will create interest in the community on the value of these biomarkers in diagnosis of pediatric IBD.

Minor comments:

A Violin plots of the final model (combined) signature in SC vs IBD can be useful to include as part of a supplementary figure. The authors have included the violin plots for individual biomarker in Figure 4B.

The author should investigate new published studies PMID: 36662167 for discussion.

## **Reviewer #3 (Remarks to the Author):**

In this work authors identified lipid features to diagnose pediatric IBD by analyzing plasma samples from a Swedish inception cohort of treatment-naïve pediatric patients with suspected IBD (n=94). Further they were validated in a Norwegian inception cohort (n=116) with serum as sample. They found two molecular lipid species, lactosyl ceramide (d18:1/16:0) and phosphatidylcholine (18:0p/22:6) had better diagnostic performance. This word is of meaningful.

Major comments,

1. It is unusual in the discovery set, plasma was used, but in the validation set serum was used. Although it is understandable, authors can't find the same samples. Because two lipids are used, the established equation and the cutting-off value will be influenced. Authors used a nontargeted method to analyze the samples, in the use of combination marker the equation has to be established, respectively in the discovery and validation stages.
2. The sample number was not big enough, especially in the UC group. It is not possible to have the reliable scientific conclusion. Is it possible to increase the sample number if authors want to define the reliable markers for subtyping of the IBD? This is why "For IBD vs symptomatic controls, three molecular lipid species could be replicated in the validation cohort. The corresponding numbers were two for CD and one for UC". The sample number should be greatly increased, otherwise the results are difficult to be repeated, and "The discrepancy between the previous findings and the results in this study may be explained by the use of metabolomics vs non-targeted lipidomics and differences in sample size" (lines 470-472).

Minor comments,

3. Internal standard mixture should be given.
4. In line 238, two "according to"
5. In fact because of difficult in the quality control, 32 molecular lipid species used to stratify the IBD from the control have no meaning.
6. Authors found that "the relationship of LacCer(d18:1/16:0), but not PC(18:1p/22:6), and IBD is influenced by age and BMI". In Table 1 the significance of age and BMI in different groups should be given. In the AUC calculations age and BMI should be adjusted.

#### **Reviewer #4 (Remarks to the Author):**

This paper proposed a blood-based diagnostic lipidomic signature for pediatric inflammatory bowel disease (IBD).

An important finding is that a diagnostic algorithm has been constructed with only two markers, lactosyl ceramide (d18:1/16:0) and phosphatidylcholine (18:0p/22:6).

As stated in Introduction, this study aims to develop biomarkers for early diagnosis, and evaluation based on AUC alone is considered inappropriate.

A marker that can be used to screen potential patients with a blood test quickly would be desirable.

Evaluating the specificity using a highly sensitive cutoff value (e.g., sensitivity = 90% or 95%) would be more appropriate.

It is difficult to determine whether the marker is suitable for early diagnosis based on analyzing the optimal cutoff by Youden's index.

This paper uses CRP alone as a comparison, but it would be better to compare it with other blood tests, Etc.

Reference 10 (Levine A et al., J Pediatr Gastroenterol Nutr 2014) cited in the Introduction deals with diagnostic methods recommended in children with suspected IBD.

This recommendation includes biomarkers (e.g., fecal calprotectin (FC) and lactoferrin) other than CRP.

"Recommendation. Initial blood tests should include a complete blood count, at least two inflammatory markers, albumin, transaminases, and gGT. Fecal calprotectin is superior to any blood marker for detecting intestinal inflammation (EL2, RGC)."

"Pediatric data exist primarily for FC and lactoferrin. Both markers are excellent tools for identifying the presence of intestinal inflammation with high sensitivity."

Both the test and validation cohorts in this study have small sample sizes.

Since sensitivity and specificity can be evaluated in a retrospective case-control study, it would be desirable to validate the results on a slightly larger scale of data.

It is important to note that this study includes a prospective cohort study.

In Table 2, a hypothesis test of the difference in AUC for additional biomarkers has been performed, but such an evaluation method is inappropriate.

It would be preferable to use and add the integrated discriminant improvement (IDI) to evaluate discrimination when a "new" model incorporates additional biomarkers and an "old" model without them.

- Pencina MJ, D'Agostino RB Sr, Demler OV. Novel metrics for evaluating improvement in discrimination: net reclassification and integrated discrimination improvement for normal variables and nested models. *Stat Med.* 2012;31(2):101-13. doi: 10.1002/sim.4348.

- Hayashi K, Eguchi S. The power-integrated discriminant improvement: An accurate measure of the incremental predictive value of additional biomarkers. *Stat Med.* 2019;38(14):2589-2604. doi:10.1002/sim.8135

2  
3 **Reviewer #1 (Remarks to the Author):**

4  
5 The authors present a study on identification, validation and comparison of a novel lipidomic  
6 signature for diagnosis of PIBD. The comparison to CRP and FcP, alongside validation in a  
7 distinct cohort is important. The study is of interest, has a clear clinical translation (although  
8 the emphasis on diagnosis vs screening might need to be considered) and is well written. I  
9 have comments and questions which may be addressed by the authors to clarify points.

10  
11  
12 Introduction-The authors present a good overview of the topic. I think the emphasis on  
13 diagnosis may be slightly confusing- is this a tool aiming to help with screening? Such as  
14 CRP or FcP? Diagnostic processes are through endoscopy, and thus this tool will not be  
15 replacing that method of diagnosis. CRP, for example, may be a useful as a (relatively)  
16 sensitive tool, but it is highly non-specific. FcP is a fantastic screening and monitoring tool,  
17 and stool tests are much more widely accepted, especially with postal kits and home testing  
18 kits available.

19  
20 **Response:** We would like to thank the reviewer for the thoughtful comment. It is certainly  
21 correct that the method is only to be used as a first screening tool in the diagnostic pathway  
22 and not to replace endoscopy as the method of diagnosis. We have updated the introduction  
23 and discussion to reflect this as indicated below:

24  
25 Introduction

26 *...” Several plasma or serum biochemical markers have been investigated as biomarkers in*  
27 *the diagnostic pathway in IBD, i.e., identifying those who should be referred for endoscopy*  
28 *and further investigations.”...*

29  
30  
31 Discussion

32 *...” Taken together, our study suggests a role for LacCer(d18:1/16:0) and PC(18:0p/22:6) in*  
33 *the pathophysiology of IBD and affirms the use of a blood-based lipidomic signature as a tool*  
34 *to be used in combination with existing clinically established markers to rule out pediatric IBD*  
35 *and guide referral for endoscopy and further investigations.”...*

36  
37  
38 Methods- These are nicely described. I have some specific questions-

39 - Were cases and controls recruited at the same time points, most importantly blood samples  
40 achieved at the same point in the diagnostic pathway (rather than only cases recruited at a  
41 point after bowel prep, after fasting etc.)

42  
43 **Response:** We have revised the methods section clarifying that both IBD patients and  
44 symptomatic controls in the discovery and validation cohort were included at the same point  
45 in the diagnostic pathway i.e., before the endoscopic examination.

46  
47 Methods

48 *...” Both patients with IBD and symptomatic controls were included at the same point in the*  
49 *diagnostic pathway i.e., before the endoscopic examination.”...*

50  
51 - How long after the initial recruitment were non-IBD controls followed-up for?

52 **Response:** None of the symptomatic controls in the discovery cohort were diagnosed with  
53 IBD during a follow up period of  $\geq 3$  years.

54  
55 - I am pleased the statistical methods are corrected for multiple testing

56  
57 **Response:** We thank the reviewer for noting this.

58  
59 - Am i correct in thinking that largely all patients were pooled for analyses, regardless of age,  
60 phenotypic subtype, disease severity etc.?

61  
62 **Response:** Yes, that is correct.

63  
64  
65 Results-

66 - When models were employed what was the stability of the lipid profiles ascertained in the  
67 model? I.e. when cross-validation/random sampling was done were the same lipids always  
68 identified, or were different patterns identified each time?

69  
70 **Response:** The ML models were employed using  $\alpha = 0.1$  and a lambda obtained by  
71 optimization in internal 5-fold cross-validations. The selection of the molecular lipid signature  
72 was based on 500 model fits, and all individual molecular lipid species with non-zero  
73 coefficients in any model are reported. To illustrate this, we have added variable importance  
74 scores to Figure 3.

75  
76 Results

77 *..."Information about the variable importance projection (VIP) score for each molecular lipid  
78 is provided in Figure 3."...*

79  
80  
81 - I think a NPV of 76%, whilst interesting, is likely difficult to apply in the clinic as a unique  
82 tool, however it could be used in the context of other tests. Further results indicate  
83 comparable performance to FcP in the AUC.

84  
85 **Response:** We agree that this signature could be used in combination with other tests. We  
86 have highlighted this in the conclusion of the discussion.

87  
88 Discussion

89 *..."Taken together, our study suggests a role for LacCer(d18:1/16:0) and PC(18:0p/22:6) in  
90 the pathophysiology of IBD and affirms the use of a blood-based lipidomic signature as a tool  
91 to be used in combination with existing clinically established markers to rule out pediatric IBD  
92 and guide referral for endoscopy and further investigations."...*

93  
94  
95 - For the controls, what conditions were diagnosed (if any), were all patients and controls  
96 screened for infection?

97  
98 **Response:** All individuals in each cohort followed the same diagnostic pathway and  
99 underwent the same diagnostic investigations, including screening of infections. In the  
100 cohorts, the symptomatic controls were diagnosed with various non-IBD conditions such as  
101 celiac disease, infectious enteritis, food allergy, orofacial granulomatosis, and functional  
102 gastrointestinal diseases, primarily diarrhea-prominent irritable bowel syndrome.

103  
104  
105 Would these lipid signatures be replicated in other non-IBD inflammatory states (such as  
106 infection) in a similar way to FcP, or are they distinct?

107 **Response:** We would like to thank the reviewer for the insightful comment and agree that  
108 this is a clinically relevant question. Theoretically, examination of pediatric patients with non-  
109 IBD inflammatory states, including infections would be of great interest. Unfortunately, the  
110 number of patients with infectious enteritis was too few to enable any meaningful  
111 comparison. However, we performed a targeted analysis of LacCer(d18:1/16) and  
112 PC(18:0p/22:6) in a third cohort of pediatric patients (n=263) from Norway, Denmark and UK.  
113 In this cohort, 30 patients were diagnosed with celiac disease and 164 with IBD. Significant  
114 differences in absolute concentrations of LacCer(d18:1/16) and PC(18:0p/22:6) were  
115 observed when comparing celiac disease with IBD. We have added these novel data to the  
116 revised method, results and discussion.

117

118 Method

119 See section "*Targeted confirmation of molecular lipid signature using UHPLC-MS/MS*".

120

121 Results

122 *... "To discern whether these molecular lipids serve as markers for inflammatory*  
123 *gastrointestinal diseases generally or are more IBD specific, we compared patients with IBD*  
124 *to the subset of celiac disease patients within the symptomatic controls. We observed*  
125 *significantly increased concentrations of LacCer(d18:1/16:0) ( $\beta = 1.29$ , 95%CI 0.78,1.80,*  
126  *$P < 0.001$ ) and numerically decreased concentrations of PC(18:1p/22:6) ( $\beta = -0.42$ , 95%CI -*  
127 *0.86, 0.02,  $P = 0.06$ ) in patients with IBD compared to patients with celiac disease."...*

128

129 Discussion

130 *... "In an independent third cohort, we confirmed the significant differences in the prioritized*  
131 *molecular lipids (LacCer(d18:1/16:0) and PC(18:1p/22:6)) between patients with IBD and*  
132 *symptomatic controls using a targeted absolute quantification method. Moreover, we*  
133 *demonstrated that these molecular lipids were not broad markers of inflammation but*  
134 *seemed to be more IBD specific."...*

135

136

137 - Was CRP only used in the analyses in the confirmed absence of GI or systemic infection?

138

139 **Response:** We apologize, gastrointestinal and other gastrointestinal diseases were  
140 erroneously listed as exclusion criteria in the previous version of the manuscript. We have  
141 omitted these diagnoses from exclusion criteria in the revised version of the manuscript. In  
142 general, gastrointestinal infections were ruled out by the general practitioner before referral  
143 to the pediatric departments. However, a few patients in the inception cohorts turned out to  
144 be diagnosed with infectious enteritis during diagnostic workup by the pediatric  
145 gastroenterologist. In the discovery cohort, CRP was assessed in clinical routine, whereas  
146 high sensitivity CRP was assayed in a single batch for all patients in the validation cohort.

147

148

149 - It is notable that both the discovery and validation cohorts' control children are younger than  
150 the IBD patients? How does metabolic maturation of lipids progress with age/puberty and  
151 could these models merely be detecting differences in metabolism related to age, rather than  
152 IBD vs controls?

153

154 **Response:** Thank you for highlighting this important aspect. We have augmented the  
155 information about correlation between age and the two molecular lipids and inserted a figure  
156 in the main manuscript showing this relationship (see Figure 3f). We have also highlighted  
157 the analysis illustrating the moderating effect of age on the relationship between the two  
158 molecular lipids and IBD (see Section Sensitivity analysis of short diagnostic signature  
159 LacCer(d18:1/16:0) and PC(18:1p/22:6) and Figure 5a-b). Collectively, these data  
160 demonstrate that the relationship of LacCer(d18:1/16:0), but not PC(18:1p/22:6), and IBD is  
161 influenced by age. However, when adding age, sex, BMI, and albumin to the lipid signature,

162 no clinically significant improvement in diagnostic performance was observed (AUC 0.87 vs  
163 0.89) as illustrated in Figure 4b.

164

165 - It would be useful to see a full comparison of the clinical, demographic features of IBD vs  
166 controls in table 1- including BMI etc. This has the potential to be a serious confounder.

167

168 **Response:** We have included a comparison of clinical and demographic features between  
169 IBD and symptomatic controls within both the Swedish and Norwegian cohorts in Table 1. As  
170 outlined in our response to the comment above, figures illustrating the correlation and  
171 interaction of BMI have been added to the main body of the manuscript (see Figure 3f and  
172 Figure 5a-b).

173

174

175 Discussion-

176 The discussion is well written, focusing on the literature and the important strengths and  
177 limitations of the work. I think the authors would acknowledge the limitations set out above in  
178 any revision of the article.

179

180 **Response:** Thank you for the encouraging comment, we have acknowledged the  
181 limitations above in the discussion.

182

183 Discussion

184 *...”To gain further mechanistic understanding, future studies should include patients  
185 in remission and evaluate associations of disease activity and retrieve data from  
186 follow-up visits of patients in these cohorts and examine the relationship of lipidomic  
187 species with therapy response and long-term outcomes, preferably also integrating  
188 additional omics data. For clinical translation of the molecular lipid signature, method  
189 validation and including standard curve establishment using authentic and isotope-  
190 labelled internal and injection standards as well as stability, repeatability,  
191 reproducibility, and interlaboratory studies are required for clinical implementation as  
192 well as regulatory approval. Furthermore, clinical cut-offs and corresponding  
193 likelihood ratios for various clinical scenarios need to be established. Thus, further  
194 work is required to ultimately translate our findings into an assay for clinical use.”...*

195

196

197 - Whilst this is not the purpose of the study, what is the metabolic driver of these  
198 lipids, what could the pathogenesis be resulting in elevation/decrease? With FcP  
199 there is a clear process related to inflammation in the gut, confirming that it's a  
200 biologically relevant marker for disease. This is less clear here although is alluded to  
201 in the initial paragraph.

202

203 **Response:** Thank you for your relevant comment, we have expanded the discussion  
204 on their potential role in IBD pathogenesis,

205

206 Discussion

207

208 *...” The role of sphingolipids in the context of IBD is complex and the mechanisms  
209 behind the increased levels of LacCer(d18:1/16:0) remain to be elucidated. Even  
210 though we observed increased levels already at diagnosis, it is unclear whether this  
211 finding precedes the transition from preclinical IBD to onset of symptoms and an IBD  
212 diagnosis. Experimental studies have found various sphingolipids important for  
213 plasma membrane stability and for signaling to several receptor molecules.<sup>23</sup> Lactosyl  
214 ceramides have, for instance, been found to be significantly enriched in the apical  
215 membrane of polarized intestinal epithelial cells.<sup>24</sup> Different pro-inflammatory factors  
216 have been shown to activate lactosylceramide synthase to produce lactosyl*



217 *ceramides, which in turn activate mucosal cell differentiation and maturation.*<sup>24</sup>  
218 *Ceramides can also be transformed into ceramide 1-phosphate, or they can undergo*  
219 *further degradation into sphingosine, which, in turn, can be phosphorylated to*  
220 *produce sphingosine 1-phosphate (S1P). These molecules play a critical role in the*  
221 *regulation of inflammatory processes, and recent drug developments have identified*  
222 *S1P as a treatment target for IBD, modulating migration of lymphocytes from lymph*  
223 *nodes.*<sup>25</sup> ...

224  
225  
226 ...” *Ferru-Clément et al. recently identified several structurally unique lipids*  
227 *(phosphatidylethanolamine ether (O-16:0/20:4), sphingomyelin (d18:1/21:0),*  
228 *cholesterol ester (14:1), very long-chain dicarboxylic acid [28:1(OH)] and sitosterol*  
229 *sulfate) with association to CD when compared to healthy controls, highlighting*  
230 *multiple different biologic pathways including breakdown of intestinal homeostasis*  
231 *and barrier integrity.*<sup>19</sup> *Alkyl ether PCs, in addition to their structural roles in cell*  
232 *membranes, are thought to function as endogenous antioxidants, and emerging*  
233 *studies suggest that they are involved in cell differentiation and signaling pathways.*<sup>33</sup>  
234 *These lipids have shown to be endogenous antigens to activate invariant natural killer*  
235 *T cells (iNKT),*<sup>34</sup> *and associated with autoimmunity.*<sup>35</sup> ...

236  
237 -Is there any work on these lipids (PC and LacCer) in systemic inflammation, or other  
238 inflammatory processes? Are these merely a marker of inflammation or are these specific to  
239 IBD?

240  
241 **Response:** As outlined above, we observed significant differences in absolute  
242 concentrations of LacCer(d18:1/16) and PC(18:0p/22:6) were observed when comparing IBD  
243 with celiac disease. These findings may potentially indicate that these lipids could in part be  
244 specific to IBD and may not represent markers of inflammation alone. We have added these  
245 results to the revised method, results and discussion.

246

## 247 **Reviewer #2 (Remarks to the Author):**

248

249 The authors have performed a comprehensive study of lipid omics in pediatric IBD. The patient  
250 sample characteristics shows inclusion of diverse patients. The data was analyzed by diverse  
251 mathematical and statistical perspective. Training and validation were performed according  
252 to acceptable standard. The data clearly shows the association of two newly discovered lipid  
253 species that compete well to clinically used hsCRP. The authors have reported a NPV of 76%  
254 compared to 40% for hsCRP which is significantly better. These results will create interest in  
255 the community on the value of these biomarkers in diagnosis of pediatric IBD.

256

257 **Response:** Thank you for the encouraging comment.

258

259 **Minor comments:**

260 A Violin plots of the final model (combined) signature in SC vs IBD can be useful to include  
261 as part of a supplementary figure. The authors have included the violin plots for individual  
262 biomarker in Figure 4B.

263

264 **Response:** The Reviewer has correctly pointed out that we have included violin plots to  
265 illustrate the distribution of each molecular lipid (in the revised version Figure 4a). We would  
266 be happy to further refine the plots. However, we struggle with the suggestion to include both  
267 molecular lipids in a single violin plot. We would be happy to receive further guidance if the  
268 Reviewer believes that it would be beneficial.

269  
270 The author should investigate new published studies PMID: 36662167 for discussion.

271  
272 **Response:** Thank you for bringing the study by Ferru-Clément et al. to our attention.  
273 We have included it in the discussion section according to the reviewer's suggestion.

274  
275

276 **Reviewer #3 (Remarks to the Author):**

277

278 In this work authors identified lipid features to diagnose pediatric IBD by analyzing plasma  
279 samples from a Swedish inception cohort of treatment-naïve pediatric patients with  
280 suspected IBD (n=94). Further they were validated in a Norwegian inception cohort (n=116)  
281 with serum as sample. They found two molecular lipid species, lactosyl ceramide  
282 (d18:1/16:0) and phosphatidylcholine (18:0p/22:6) had better diagnostic performance. This  
283 word is of meaningful.

284

285 **Response:** Thank you for the encouraging feedback.

286

287 Major comments,

288 1. It is unusual in the discovery set, plasma was used, but in the validation set serum was  
289 used. Although it is understandable, authors can't find the same samples. Because two  
290 lipids are used, the established equation and the cutting-off value will be influenced. Authors  
291 used a nontargeted method to analyze the samples, in the use of combination marker the  
292 equation has to be established, respectively in the discovery and validation stages.

293

294 **Response:** We agree that molecular lipids in general may have different concentrations in  
295 plasma vs serum. To address this issue, we have collected matched plasma and serum  
296 samples and performed targeted analysis of the LacCer(d18:1/16:0) and PC(18:1p/22:6) and  
297 can confirm that the concentration of these two analytes did not largely differ between the  
298 two biological fluids. This information has been added to Supplementary information.

299

300 Supplemental Method

301 *"Distribution of LacCer(d18:1/16:0) and PC(18:0p/22:6) in serum vs plasma*  
302 *Paired serum and plasma samples from healthy volunteers were analyzed to compare*  
303 *LacCer(d18:1/16:0) and PC(18:0p/22:6) concentrations using the described methodology.*  
304 *Results revealed no significant differences between serum and plasma concentrations for*  
305 *both LacCer(d18:1/16:0) (369 ng/mL in serum vs 339 ng/mL in plasma, P = 0.13) and*  
306 *PC(18:0p/22:6) (223 ng/mL in serum vs 218 ng/mL in plasma, P = 0.72). These findings*  
307 *indicate no significant differences between paired plasma and serum concentrations."*

308

309 2. The sample number was not big enough, especially in the UC group. It is not possible to  
310 have the reliable scientific conclusion. Is it possible to increase the sample number if authors  
311 want to define the reliable markers for subtyping of the IBD? This is why "For IBD vs  
312 symptomatic controls, three molecular lipid species could be replicated in the validation  
313 cohort. The corresponding numbers were two for CD and one for UC". The sample number  
314 should be greatly increased, otherwise the results are difficult to be repeated, and "The  
315 discrepancy between the previous findings and the results in this study may be explained by  
316 the use of metabolomics vs non-targeted lipidomics and differences in sample size" (lines  
317 470-472).

318

319 **Response:** We agree that a larger sample size, i.e., patient population, would increase the  
320 possibility to identify molecular lipids that are associated with IBD and especially UC.  
321 However, signatures of many lipids may preclude their translation to clinical practice. To  
322 strengthen our findings from the discovery and validation, we have now performed a targeted  
323 analysis of absolute concentrations of LacCer(d18:1/16) and PC(18:0p/22:6) in a third cohort  
324 of pediatric patients (n=263) from Norway, Denmark, and UK. We could demonstrate that the  
325 comparison of IBD with symptomatic controls was consistent with our previous results. Also,  
326 as correctly pointed out by the Reviewer, separate analysis of CD and UC showed significant  
327 differences compared to symptomatic controls when examining this large third cohort, except  
328 for PC(18:0p/22:6), in the comparison of UC vs symptomatic controls (see Figure 6). These  
329 results provide additional confirmation that LacCer(d18:1/16) and PC(18:0p/22:6)  
330 concentrations serve as reliable markers of IBD. We have added these new results to the  
331 revised method, results, and discussion sections.

332  
333 As noted by the Reviewer, differences in metabolomics platforms and sample size  
334 probably explains why we could identify several differentially associated lipids in our analysis  
335 of the Swedish regional cohort (see Figure 2a), whereas this was not the case when  
336 analysing plasma from a subset of patients in the ancillary study (Nyström et al., 2022).

337  
338 Minor comments,

339 3. Internal standard mixture should be given.

340

341 **Response:** We have revised according to the Reviewer's suggestion.

342

343 Methods

344 ...*The internal standard solution contained the following compounds:*  
345 *phosphatidylethanolamine (PE(17:0/17:0)), sphingomyelin (SM(d18:1/17:0)), ceramide*  
346 *(Cer(d18:1/17:0)), phosphatidylcholine (PC(17:0/17:0)), lysophosphatidylcholine (LPC(17:0))*  
347 *and lysophosphatidylcholine (PC(16:0/d31/18:1)), were purchased from Avanti Polar Lipids,*  
348 *Inc. (Alabaster, AL, USA) and triheptadecanoylglycerol (TG(17:0/17:0/17:0)), and cholesteryl*  
349 *ester (CE17:0) were purchased from Larodan AB (Solna, Sweden). The calibration curve*  
350 *solutions contained the following compounds: LPC (18:0), cholesteryl ester (18:1, 9Z),*  
351 *Cer(d18:1/24:0), Cer(d18:0/18:1, 9Z), triglyceride (16:0/16:0/16:0), PC(16:0/16:0),*  
352 *Triglyceride (18:0/18:0/18:0), CE(18:0), LPC(18:1), LPE(18:1), PC(16:0/18:1),*  
353 *Cer(d18:1/18:1, 9Z), PC(18:0/18:0), PE(16:0/18:1), CE(18:2, 9Z, 12Z), CE(16:0)),*  
354 *DG(18:1)."*...

355

356

357 4. In line 238, two "according to"

358

359 **Response:** We have deleted this duplicate.

360

361 5. In fact because of difficult in the quality control, 32 molecular lipid species used to stratify  
362 the IBD from the control have no meaning.

363

364 **Response:** We agree that the 32 molecular lipid species are of limited value for clinical  
365 translation but have kept this information since these lipids may disclose novel biological  
366 mechanisms related to development of IBD. Moreover, we have expanded the discussion on  
367 potential disease mechanisms related to our findings.

368

369 Discussion

370 ...” *The fact that two of these cohorts were represented by only treatment-naïve children*  
371 *demonstrates that the increase occurs already at diagnosis. We further extended these*  
372 *findings by showing that the association of LacCer(d18:1/16:0) with IBD was most*  
373 *pronounced in older pediatric patients and in those with a higher BMI. These interactions*  
374 *have not been reported previously and are likely attributed to biological factors linked to*  
375 *childhood growth, development, and changing physiology. The role of sphingolipids in the*  
376 *context of IBD is complex and the mechanisms behind the increased levels of*  
377 *LacCer(d18:1/16:0) remain to be elucidated. Even though we observed increased levels*  
378 *already at diagnosis, it is unclear whether this finding precedes the transition from preclinical*  
379 *IBD to onset of symptoms and an IBD diagnosis. Experimental studies have found various*  
380 *sphingolipids important for plasma membrane stability and for signaling to several receptor*  
381 *molecules.<sup>23</sup> Lactosyl ceramides have, for instance, been found to be significantly enriched in*  
382 *the apical membrane of polarized intestinal epithelial cells.<sup>24</sup> Different pro-inflammatory*  
383 *factors have been shown to activate lactosylceramide synthase to produce lactosyl*  
384 *ceramides, which in turn activate mucosal cell differentiation and maturation.<sup>24</sup> Ceramides*  
385 *can also be transformed into ceramide 1-phosphate, or they can undergo further degradation*  
386 *into sphingosine, which, in turn, can be phosphorylated to produce sphingosine 1-phosphate*  
387 *(S1P). These molecules play a critical role in the regulation of inflammatory processes, and*  
388 *recent drug developments have identified S1P as a treatment target for IBD, modulating*  
389 *migration of lymphocytes from lymph nodes.<sup>25</sup> ...*

390  
391 ...” *Ferru-Clément et al. recently identified several structurally unique lipids*  
392 *(phosphatidylethanolamine ether (O-16:0/20:4), sphingomyelin (d18:1/21:0), cholesterol*  
393 *ester (14:1), very long-chain dicarboxylic acid [28:1(OH)] and sitosterol sulfate) with*  
394 *association to CD when compared to healthy controls, highlighting multiple different biologic*  
395 *pathways including breakdown of intestinal homeostasis and barrier integrity.<sup>19</sup> Alkyl ether*  
396 *PCs, in addition to their structural roles in cell membranes, are thought to function as*  
397 *endogenous antioxidants, and emerging studies suggest that they are involved in cell*  
398 *differentiation and signaling pathways.<sup>33</sup> These lipids have shown to be endogenous antigens*  
399 *to activate invariant natural killer T cells (iNKT),<sup>34</sup> and associated with autoimmunity.<sup>35</sup>*  
400 *Collectively, our findings of depletion of plasma and serum PC(18:0p/22:6) in pediatric IBD*  
401 *may act as a potential treatment target. This hypothesis is supported by the finding that PC-*  
402 *rich phospholipid supplementation (6g daily) over three months resulted in an overall*  
403 *decreased inflammatory activity in patients with UC.<sup>36</sup> ...*

404  
405 6. Authors found that “the relationship of LacCer(d18:1/16:0), but not PC(18:1p/22:6), and  
406 IBD is influenced by age and BMI”. In Table 1 the significance of age and BMI in different  
407 groups should be given. In the AUC calculations age and BMI should be adjusted.

408  
409 **Response:** Table 1 has been revised as suggested. Also, we have added age, BMI, sex,  
410 and albumin (as suggested by Reviewer 4) to the signature (see Figure 5b). As illustrated, no  
411 clinically significant improvement in diagnostic performance was observed when adding  
412 these covariates (AUC 0.87 vs 0.89).

413  
414 **Reviewer #4 (Remarks to the Author):**

415  
416 This paper proposed a blood-based diagnostic lipidomic signature for pediatric inflammatory  
417 bowel disease (IBD). An important finding is that a diagnostic algorithm has been constructed  
418 with only two markers, lactosyl ceramide (d18:1/16:0) and phosphatidylcholine (18:0p/22:6).

419  
420  
421  
422  
423  
424  
425  
426  
427  
428  
429  
430  
431  
432  
433  
434  
435  
436  
437  
438  
439  
440  
441  
442  
443  
444  
445  
446  
447  
448  
449  
450  
451  
452  
453  
454  
455  
456  
457  
458  
459  
460  
461  
462  
463  
464  
465  
466  
467

As stated in Introduction, this study aims to develop biomarkers for early diagnosis, and evaluation based on AUC alone is considered inappropriate. A marker that can be used to screen potential patients with a blood test quickly would be desirable. Evaluating the specificity using a highly sensitive cutoff value (e.g., sensitivity = 90% or 95%) would be more appropriate. It is difficult to determine whether the marker is suitable for early diagnosis based on analyzing the optimal cutoff by Youden's index.

**Response:** We would like to thank the reviewer for the thoughtful comment. In line with our response to Reviewer 1, we would like to highlight that the molecular lipid signature is only to be used as a first screening tool in the diagnostic pathway and not supposed to replace endoscopy as the method of diagnosis. However, the signature is not supposed to be applied as a screening instrument for the general population. Moreover, we agree that a highly sensitive blood-test would be desirable for screening as long as its specificity remains reasonable. But the tradeoff between sensitivity and specificity may differ between various clinical scenarios (such as screening for disease in the general population, identifying patients at primary care level who should be referred for further investigations, or identifying patients at the secondary care level). In our revised introduction and updated discussion, we have clarified that the molecular lipid signature has the potential to complement existing markers when assessing patients presenting gastrointestinal symptoms suggestive of possible IBD. We have highlighted this in the conclusion.

Conclusion

*...”Taken together, our study suggests a role for LacCer(d18:1/16:0) and PC(18:0p/22:6) in the pathophysiology of IBD and affirms the use of a blood-based lipidomic signature as a tool to be used in combination with existing clinically established markers to rule out pediatric IBD and guide referral for endoscopy and further investigations.”...*

This paper uses CRP alone as a comparison, but it would be better to compare it with other blood tests, Etc. Reference 10 (Levine A et al., J Pediatr Gastroenterol Nutr 2014) cited in the Introduction deals with diagnostic methods recommended in children with suspected IBD. This recommendation includes biomarkers (e.g., fecal calprotectin (FC) and lactoferrin) other than CRP. "Recommendation. Initial blood tests should include a complete blood count, at least two inflammatory markers, albumin, transaminases, and gGT. Fecal calprotectin is superior to any blood marker for detecting intestinal inflammation (EL2, RGC)." "Pediatric data exist primarily for FC and lactoferrin. Both markers are excellent tools for identifying the presence of intestinal inflammation with high sensitivity."

**Response:** We agree that guidelines on the diagnosis of IBD include various laboratory tests. However, several of these tests (transaminases and gGT) are used to identify patients with disease complications. Among above mentioned blood tests, albumin probably has the greatest capacity to differentiate IBD from symptomatic controls i.e., patients with other diagnoses. Therefore, we have measured albumin and added these results to the revised manuscript (see Figure 5b).

Both the test and validation cohorts in this study have small sample sizes. Since sensitivity and specificity can be evaluated in a retrospective case-control study, it would be desirable to validate the results on a slightly larger scale of data. It is important to note that this study includes a prospective cohort study.

468  
469  
470  
471  
472  
473  
474  
475  
476  
477  
478  
479  
480  
481  
482  
483  
484  
485  
486  
487  
488  
489  
490  
491  
492  
493  
494  
495  
496  
497  
498  
499  
500  
501  
502  
503  
504  
505  
506  
507  
508  
509  
510  
511  
512  
513  
514  
515  
516  
517

**Response:** We agree that the number of patients in the discovery and validation cohorts may seem low, but pediatric IBD is an uncommon condition. To address the limitations with sample size, we have now performed a targeted analysis of absolute concentration LacCer(d18:1/16) and PC(18:0p/22:6) in a third larger cohort of pediatric patients (n=263) from Norway, Denmark, and UK. These new results further confirm that concentrations of LacCer(d18:1/16) and PC(18:0p/22:6) serve as classifiers of pediatric IBD vs symptomatic controls. The consistent observations across three distinct cohorts; discovery (Sweden, n=94), validation (Norway, n=117), and confirmation (Norway, Denmark, and UK, n=263), enhances the robustness of our findings. We have now added these new results in the revised method, results, and discussion sections.

Even though the analysis of the third cohort confirmed our findings, establishment of cut-offs for clinical use requires further assay development. We have elaborated on these aspects of clinical translation in the discussion.

Discussion

*...”For clinical translation of the molecular lipid signature, method validation and including standard curve establishment using authentic and isotope-labelled internal and injection standards as well as stability, repeatability, reproducibility, and interlaboratory studies are required for clinical implementation as well as regulatory approval. Furthermore, clinical cut-offs and corresponding likelihood ratios for various clinical scenarios need to be established. Thus, further work is required to ultimately translate our findings into an assay for clinical use.”...*

In Table 2, a hypothesis test of the difference in AUC for additional biomarkers has been performed, but such an evaluation method is inappropriate. It would be preferable to use and add the integrated discriminant improvement (IDI) to evaluate discrimination when a "new" model incorporates additional biomarkers and an "old" model without them.

- Pencina MJ, D'Agostino RB Sr, Demler OV. Novel metrics for evaluating improvement in discrimination: net reclassification and integrated discrimination improvement for normal variables and nested models. *Stat Med.* 2012;31(2):101-13. doi: 10.1002/sim.4348.  
- Hayashi K, Eguchi S. The power-integrated discriminant improvement: An accurate measure of the incremental predictive value of additional biomarkers. *Stat Med.* 2019;38(14):2589-2604. doi:10.1002/sim.8135

**Response:** We agree that the employing these methods provides additional important information about the capacity of the two molecular lipids for discriminating between patients with IBD and symptomatic controls in comparison to hsCRP alone.

We have assessed the net reclassification index (NRI) and the integrated discriminant improvement (IDI) for a model based on hsCRP with the addition of the two molecular lipids and present the findings in the results, including Table 4, and in the discussion.

Methods

*...”Reclassification was assessed using net reclassification index (NRI) and integrated discrimination improvement (IDI).<sup>49</sup>...”*

518 Results

519 ...” To further assess the clinical relevance of the short lipidomic signature, we also evaluated  
520 its capacity to reclassify patients with IBD vs symptomatic controls in the validation cohort.  
521 The addition of LacCer(d18:1/16:0) and PC(18:0p/22:6) to hsCRP, significantly improved  
522 reclassification, as demonstrated by analysis of both NRI and IDI ( $P < 0.001$  for both) (**Table**  
523 **4**). Evaluating the net reclassification impact of LacCer(d18:1/16:0) and PC(18:0p/22:6), we  
524 observed a substantial improvement of 11% in reclassification of cases with IBD and 14% in  
525 reclassification of symptomatic controls, reflecting their dual contribution. This indicates an  
526 improved clinical utility of the molecular lipid signature over hsCRP alone.”...

527

528 Discussion

529 ...” For clinical translation, we demonstrated that a signature of only two molecular lipid  
530 species, i.e., LacCer(d18:1/16:0) and PC(18:0p/22:6), was superior to hsCRP and the  
531 addition of these molecular lipids to hsCRP, significantly improved the reclassification of  
532 patients with IBD from symptomatic controls in the validation cohort.”...

## **REVIEWER COMMENTS**

### **Reviewer #1 (Remarks to the Author):**

The authors have extensively revised their original manuscript in line with the author comments. I am satisfied that most of these points have been addressed.

I have one outstanding question related to the ability of the signature to differentiate between cases/controls. Specifically, is this a signature related to gut inflammation per se, or specifically to IBD. The role of calprotectin here may be useful- does the lipid profile correlate to calprotectin in the non-IBD cases (such as infectious cases).

There is a hint this might be the cases, with younger children having a more pronounced predictive effect of the lipid signature, and a known association with high calprotectin values in younger children (reflecting normal intestinal immune maturation).

I think this is a key point- are we talking about a biomarker of intestinal inflammation (like calprotectin), or something specific to IBD. Without clarification of these data I think this limitation must be mentioned in the abstract and discussion

### **Reviewer #2 (Remarks to the Author):**

The authors have provided adequate response to all the reviewers.

### **Reviewer #3 (Remarks to the Author):**

Authors have addressed all of my questions. I have no other comments.

### **Reviewer #4 (Remarks to the Author):**

The authors responded appropriately to my comments.  
I appreciate the authors' efforts.

I have one minor comment about my (reviewer #4) first comment.

While I understand the authors' opinion, interpreting sensitivity and specificity under a cutoff value based on Youden's index is rarely valuable for clinical practice.

Table 3 should be modified to show the sensitivity or specificity for hsCRP and PC(18:0p/22:6)+LacCer(d18:1/16:0) for high sensitivity or high specificity cases (e.g., Se = 90%, 95% and Sp = 90%, 95%), respectively.



2  
3 **Reviewer #1 (Remarks to the Author):**

4  
5 The authors have extensively revised their original manuscript in line with the author  
6 comments. I am satisfied that most of these points have been addressed.

7  
8 I have one outstanding question related to the ability of the signature to differentiate between  
9 cases/controls. Specifically, is this a signature related to gut inflammation per se, or  
10 specifically to IBD. The role of calprotectin here may be useful- does the lipid profile correlate  
11 to calprotectin in the non-IBD cases (such as infectious cases).

12  
13 There is a hint this might be the cases, with younger children having a more pronounced  
14 predictive effect of the lipid signature, and a known association with high calprotectin values  
15 in younger children (reflecting normal intestinal immune maturation).

16  
17 I think this is a key point- are we talking about a biomarker of intestinal inflammation (like  
18 calprotectin), or something specific to IBD. Without clarification of these data, I think this  
19 limitation must be mentioned in the abstract and discussion.

20  
21 **Response:** We would like to thank the reviewer for carefully reviewing our revised  
22 manuscript. We have performed the proposed analysis and added the results to the revised  
23 manuscript.

24  
25 **Results**

26 *... "In order to examine whether the molecular lipids reflect neutrophil activity and gut  
27 inflammation per se or are specific to IBD, we assessed the correlation between the  
28 molecular lipids and fecal calprotectin levels in the symptomatic controls only. However, no  
29 statistically significant correlations were observed between fecal calprotectin and  
30 LacCer(d18:1/16:0) ( $r = 0.28$ ,  $P = 0.13$ ), or PC(18:1p/22:6) ( $r = 0.21$ ,  $P = 0.25$ )."*

31  
32 **Discussion**

33 *... "Although we were unable to clearly demonstrate that the molecular lipid signature is  
34 unique to IBD, the finding of different concentrations of LacCer(d18:1/16:0) and  
35 PC(18:1p/22:6) in patients with IBD compared to patients with celiac disease (another  
36 inflammatory disease) indicates that these are not general markers of inflammation. These  
37 findings were further supported by the absence of significant correlations between the two  
38 molecular lipids and fecal calprotectin levels among symptomatic controls only."...*

39  
40  
41 **Reviewer #4 (Remarks to the Author):**

42  
43 The authors responded appropriately to my comments.  
44 I appreciate the authors' efforts.

45  
46 I have one minor comment about my (reviewer #4) first comment.

47  
48 While I understand the authors' opinion, interpreting sensitivity and specificity under a cutoff  
49 value based on Youden's index is rarely valuable for clinical practice.



## **REVIEWERS' COMMENTS**

### **Reviewer #1 (Remarks to the Author):**

All points addressed, recommend to accept

### **Reviewer #4 (Remarks to the Author):**

I have no additional comments. Thank you.
